# Enhanced efficacy of vaccination with vaccinia virus in old versus young mice

1 **Evgeniya V. Shmeleva, Geoffrey L. Smith\*, Brian J. Ferguson\***

2 Department of Pathology, University of Cambridge, Cambridge, UK

3 **\* Correspondence:**

4 Brian J. Ferguson [bf234@cam.ac.uk](mailto:bf234@cam.ac.uk), Geoffrey L. Smith [gls37@cam.ac.uk](mailto:gls37@cam.ac.uk)

5 **Keywords:** aging, vaccine efficacy, elderly, immune response, vaccinia virus

## 6 **Abstract**

7 Immunosenescence is believed to be responsible for poor vaccine efficacy in the elderly. To  
8 overcome this difficulty, research into vaccination strategies and the mechanisms of immune  
9 responses to vaccination is required. By analyzing the innate and adaptive immune responses to  
10 vaccination with vaccinia virus (VACV) in mice of different age groups, we found that immune cell  
11 recruitment, production of cytokines/chemokines and control of viral replication at the site of  
12 intradermal vaccination were preserved in aged mice and were comparable with younger groups.  
13 Analysis of cervical draining lymph nodes (dLN) collected after vaccination showed that numbers of  
14 germinal center B cells and follicular T helper cells were similar across different age groups. The  
15 number of VACV-specific CD8 T cells in the spleen and the levels of serum neutralizing antibodies 1  
16 month after vaccination were also comparable across all age groups. However, following intranasal  
17 challenge of vaccinated mice, body weight loss was lower and virus was cleared more rapidly in aged  
18 mice than in younger animals. In conclusion, vaccination with VACV can induce an effective  
19 immune response and stronger protection in elderly animals. Thus, the development of recombinant  
20 VACV-based vaccines against different infectious diseases should be considered as a strategy for  
21 improving vaccine immunogenicity and efficacy in the elderly.

## 22 **1 Introduction**

23 Old people have increased susceptibility to viral and bacterial infections (1) and in people above 65,  
24 about a third of mortality is related to infections (2, 3). Prophylactic vaccination is recommended for  
25 the elderly to reduce the burden and severity of infectious diseases (4). However, the elderly respond  
26 poorly to the majority of existing vaccines, including vaccines against influenza virus,  
27 pneumococcus, hepatitis B, tetanus, pertussis, and diphtheria (5–10). It is important, therefore, to  
28 search for ways to overcome this barrier.

29 The reported decline in the immune system fitness with age, is thought to contribute to reduced  
30 vaccine efficacy in humans and mice (5, 6, 11, 12). This decline impacts both innate and adaptive  
31 immunity. Impaired recognition of microorganisms and their components, inadequate receptor  
32 signaling, and altered cytokine production have all been reported (13). Additionally, dysfunctionality  
33 of innate immune cells such as neutrophils, NK cells, monocytes, macrophages and dendritic cells in  
34 their ability to migrate, perform phagocytosis, kill bacteria and secrete cytokines have been noted (2,  
35 14–16). Decline in the performance of multiple aspects of the adaptive immune response with age  
36 also occurs. This includes decreased numbers of naïve T cells, a reduced TCR repertoire, an impaired  
37 clonal expansion and generation of functional effector and memory T cells, a decrease in

38 immunoglobulin class switch recombination, and restricted B cell diversity and antibody production  
39 (7, 11, 17).

40 Vaccinia virus (VACV), a dsDNA poxvirus (18), is the vaccine used to eradicate smallpox (19).  
41 VACV replicates in the cytoplasm of infected cells and has a large genome containing approximately  
42 200 genes (20). Between one third and one half of these genes encode proteins dedicated to immune  
43 evasion (21). Although VACV is immunosuppressive, vaccination with VACV in humans and mice  
44 results in the generation of robust, long-lasting antibody and T-cell memory that provides protection  
45 against re-infection (21–25). The ability of VACV to generate such potent humoral and cellular  
46 memory, and its proven ability to protect a population against infectious disease, makes it an  
47 excellent model system for studying immune response to vaccination. In this study, we use a mouse  
48 model of VACV intradermal vaccination that generates protective immunity against re-infection (26).  
49 In this model, both antibody and T cell memory responses are robust and consistent and contribute to  
50 protection against subsequent challenge with VACV (27, 28). Although VACV has been studied  
51 intensively in multiple models, the influence of aging on the immune and vaccination responses to  
52 VACV is unexplored. In this study, we analyzed the innate and adaptive immune response to VACV  
53 infection and evaluated subsequent resistance to re-infection in three different age groups of mice.

## 54 **2 Materials and Methods**

### 55 **2.1 Animals and study design**

56 C57BL/6 female mice were used in the study. All animals were purchased from Charles River and  
57 housed in the Cambridge University Biomedical Services facility. All animal experiments were  
58 conducted according to the Animals (Scientific Procedures) Act 1986 under PPL 70/8524 issued by  
59 UK Home Office.

60 The animal experiments included intradermal (i.d.) vaccination and intranasal (i.n.) challenge (Fig.  
61 1). Animals of 7, 22 and 54 weeks old (wo) received i.d. injections with  $10^4$  plaque-forming unit  
62 (PFU) of VACV strain Western Reserve (WR) or control vehicle (0.01% BSA/PBS) into both ear  
63 pinnae. VACV used for infection of animals was purified from infected cells by sedimentation  
64 through a sucrose cushion and subsequently through a sucrose density gradient. Virus infectious titers  
65 were determined by plaque assay on BSC-1 cells and frozen at  $-70\text{ }^{\circ}\text{C}$  until use. To evaluate the  
66 immune response during the acute stage post vaccination, ear tissues and cervical draining lymph  
67 nodes (dLN) were collected at day (d) 7 after i.d. infection for measurement of infectious viral titers  
68 (by plaque assay), leukocyte infiltration (by FACS) and levels of cytokines/chemokines (by Luminex  
69 assay). Serum and spleens were obtained at 29 d post i.d. injections to measure the titers of anti-  
70 VACV neutralizing antibodies and the composition of T cell subpopulations.

71 To assess the efficacy of vaccination, vaccinated mice (33 d post i.d. VACV infection) and naïve  
72 (non-vaccinated) mice were challenged i.n. with  $\sim 10^7$  PFU of VACV WR. The body weights of  
73 animals were monitored daily. Whole lungs were collected at 12, 24 and 48 h post challenge to  
74 measure the viral load and the levels of cytokines/chemokines in tissue.

75 The baseline of immunological parameters was measured in the blood, spleens and lungs of naïve,  
76 uninfected animals (n=4).

### 77 **2.2 Flow cytometry**

78 FACS analysis was performed to measure the immune cells present in ear tissue, cervical dLN, blood  
79 and spleens of vaccinated and mock-vaccinated animals.

80 Ear pinnae were collected at 7 d post i.d. infection, then separated into dorsal and ventral layers and  
81 both leaflets were placed into 1.5 ml of the RPMI-1640 (Gibco, Cat. # 21875034) medium containing  
82 750 U/ml of collagenase I (Gibco, Life Technologies, Cat. # 17018-029) and 100 U/ml of DNase I  
83 (Invitrogen, Cat. # 18047-019), followed by 1 h incubation at 37 °C on an orbital shaker, at 1100  
84 rpm. Suspensions containing digested ear samples were mashed through a 70- $\mu$ m cell-strainer, mixed  
85 with 10 ml of RPMI-1640 medium containing 35% of isotonic Percoll (Sigma, Cat. # P1644-500ML)  
86 and centrifugated for 10 min at 940 relative centrifugal force (rcf) without use of brake, at 21 °C.  
87 Then the supernatants were removed and the cells were washed with PBS.

88 To obtain cells from spleen or dLN, organs were mashed through 70- $\mu$ m cell-strainers and washed  
89 with PBS.

90 Before antibody staining of prepared cell suspensions, red blood cells (RBC) were lysed with BD  
91 Pharm Lyse (BD Biosciences, Cat. # 555899) and washed twice. The suspensions were then passed  
92 through 70- $\mu$ m Pre-Separation Filters (Miltenyi, Cat. # 130-095-823) and cells were counted using a  
93 NucleoCounter NC-250 (Chemometec).

94 For the staining of cell surface markers, the samples were incubated with Zombie Fixable Viability  
95 dye (Suppl. Table 1) and, after one washing step, purified rat anti-mouse CD16/CD32 antibody  
96 (Mouse BD Fc Block) (BD Biosciences, Cat. # 553141) was added to the cell suspension to block  
97 non-specific binding. For intracellular Bcl-6 and Ki-67 staining, Foxp3 / Transcription Factor  
98 Staining Buffer Set (eBioscience, Cat. # 00-5523-00) was used. Then surface or intracellular markers  
99 were stained with monoclonal antibodies (mAbs). The myeloid panel for surface staining of ear  
100 tissue included: CD45, Siglec-F, CD11c, CD11b, Ly6C, Ly6G, as well as dump channel markers  
101 (CD3, CD5, CD19, NK1.1). The lymphoid cells in ear tissue were identified using mAbs to CD45,  
102 NK1.1, CD3, CD4, CD8 and with MHC dextramer H-2Kb/TSYKFESV. For assessment of VACV-  
103 specific CD8 T cells in the dLN, the cells were stained with mAbs to CD45, CD19, CD3, CD8 and  
104 with MHC dextramer H-2Kb/TSYKFESV. The panel for identification of germinal center B cells and  
105 follicular helper T lymphocytes in dLNs included mAbs to CD4, CXCR5, PD-1, B220, Bcl-6 and ki-  
106 67. Subpopulations of CD4 and CD8 T cells in spleen were determined by staining with mAbs to  
107 CD45, CD3, CD8, CD4, CD62L and CD44 and with MHC dextramer H-2Kb/TSYKFESV. All dyes  
108 and mAbs used in the study are listed in Suppl. Table 1. After final washing steps, cells were  
109 resuspended with PBS containing 4% paraformaldehyde and were analyzed by FACS on a BD  
110 LSRFortessa (BD Biosciences). Gating strategies are shown in Suppl. Figs. 1-5.

111 For the Trucount assay, blood was collected into Micro K3EDTA Tubes (Sarstedt, Cat. #  
112 41.1395.005) to prevent clot formation. Then, 50  $\mu$ l of whole blood was pipetted into the bottoms of  
113 BD Trucount Tubes (BD Biosciences, Cat. # 340334), followed by 5 min incubation with Mouse BD  
114 Fc Block. The samples were then stained with mAbs to CD45, CD3, CD4, CD8, CD19, NK1.1,  
115 CD11b and Ly6G (Suppl. Table 1). After RBC lysis, and without washing steps, the absolute  
116 numbers of different leukocyte populations were determined by analysis on a BD LSRFortessa. The  
117 gating strategy is shown in Suppl. Fig. 6.

### 118 **2.3 Intravascular staining**

119 To discriminate leukocytes resident in ear tissue from cells located in vasculature, intravascular  
120 staining was undertaken as described (29). Briefly, 5 mins before culling, mice were given an

121 intravenous infusion into the tail vein of anti-CD45-BV421 mAb (BioLegend, Cat. # 103134). Ears  
122 were then collected, and cells were isolated as described under Flow cytometry above. The cell  
123 suspension from ear tissue was stained with anti-CD45-PE (BioLegend, Cat. # 103106). Blood  
124 leukocytes were gated as double positive (CD45-BV421<sup>+</sup> CD45-PE<sup>+</sup>) cells, while tissue immune cells  
125 were positive only for CD45-PE (see Suppl. Fig. 7).

## 126 **2.4 Identification of cytokines and chemokines in ear, dNL and lung tissues**

127 Whole ears, dLN or lungs were homogenized in 1.5 ml flat-bottom tubes containing 400  $\mu$ l of 0.5%  
128 BSA/PBS using an OMNI Tissue Homogenizer with plastic hard tissue probes (OMNI International).  
129 The tissue homogenates were centrifugated at 10,000 rcf for 20 min, at 4 °C and supernatants were  
130 obtained and stored at -70 °C. Magnetic Luminex Mouse Premixed Multi-Analyte kits were  
131 purchased from R&D Systems, to assess levels of IFN $\gamma$ , TNF $\alpha$ , IL-1 $\beta$ , IL-4, IL-6, IL-10, IL-33,  
132 CCL2, CCL3, CCL4, CCL5, CCL7, CCL20, CXCL1, CXCL2, CXCL5 (LIX) and CXCL10 using a  
133 Luminex 200 analyzer (Luminex Corporation).

## 134 **2.5 Measurement of viral loads in ear and lung tissues**

135 Whole ears and lungs were homogenized as described above. The homogenates underwent 3 cycles  
136 of freezing-thawing-sonicating to rupture cells and release the virus. Titers of infectious virus in ear  
137 samples were then determined by plaque assay using BSC-1 cell monolayers.

138 The VACV load in the lungs of vaccinated mice was measured by determining the virus genome  
139 copy number by qPCR as described (30). Genome copy number correlated well with measurement of  
140 virus infectivity by plaque assay (Suppl. Fig. 8). Supernatant samples from lung tissue homogenates  
141 were prepared by centrifugation of samples at 1000 rcf for 5 min, followed by 10-fold dilution of  
142 supernatants with nuclease-free water (Cat. # AM9930, Ambion). The reaction mix for real-time  
143 qPCR included: 2  $\mu$ l of template, 10  $\mu$ l of 2x qPCRBIO Probe Mix (Cat. # PB20.21-5,  
144 PCRBiosystems), 0.8  $\mu$ l of 10  $\mu$ M VACV gene *E9L* forward primer  
145 (CGGCTAAGAGTTGCACATCCA), 0.8  $\mu$ l of 10  $\mu$ M *E9L* reverse primer  
146 (CTCTGCTCCATTTAGTACCGATTCT), 0.4  $\mu$ l of 10  $\mu$ M *E9L* probe (TaqMan MGB Probe –  
147 AGGACGTAGAATGATCTTGTA, Applied Biosystems). The reaction volume was adjusted to 20  
148  $\mu$ l with nuclease-free water. A plasmid containing the VACV *E9L* gene served as a standard and was  
149 a gift from Brian M Ward, University of Rochester Medical Center, USA. qPCR assays were run on  
150 a ViiA 7 Real-Time PCR System (Applied Biosystems) with the following protocol: initial  
151 denaturation step at 95 °C for 3 min, followed by 40 cycles of denaturation at 95 °C for 5 sec,  
152 annealing and extension at 60 °C for 30 sec.

## 153 **2.6 Assessment of VACV neutralizing antibody titer in serum**

154 Blood was collected into Microvette CB 300  $\mu$ l tubes with clot activator (Sarstedt, Cat.# 16.440.100).  
155 Blood samples were left at room temperature for 2 h to allow clot formation. After centrifugation at  
156 10,000 rcf for 5 min at room temperature, serum was collected and stored at -70 °C. Titers of  
157 neutralizing antibodies were assessed by plaque reduction neutralization test as described (31). Serum  
158 samples were incubated at 56 °C for 30 min to inactivate complement, then two-fold serial dilutions  
159 were prepared (1:50, 1:100, 1:200, 1:400, 1:800 and 1:1600) using 2.5% fetal bovine serum  
160 (FBS)/1% PenStrep/DMEM medium. The diluted serum samples, or reference samples (medium  
161 only), were mixed 1:1 with medium containing  $3.2 \times 10^2$  PFU/ml of VACV WR that had been

162 purified by sedimentation through a sucrose density gradient. After 1 h incubation at 37 °C, samples  
163 were titrated by plaque assay and half maximal inhibitory concentrations (IC50) were calculated.

## 164 **2.7 Statistical analysis**

165 SPSS v.25 and GraphPad Prism v.8 were used for statistical analysis. The Mann–Whitney U-test was  
166 applied for the comparisons of two groups of animals and two-way repeated measures (RM)  
167 ANOVA tests were performed for the analysis of time series data. The Spearman’s correlation test  
168 was used for relation analysis of variables. P values <0.05 were considered significant.

## 169 **3 Results**

170 Three groups (7, 22 or 54 weeks old [wo]) of female C57BL/6 mice were used representing young  
171 adults, middle-aged and old animals. Fifty-four-wo animals were chosen to represent the elderly  
172 group based on their general appearance (graying coat, thinning hair) and the death rate in the colony  
173 (~10% lethality over a 6-week period not associated with the experiment). One of the features of  
174 immunosenescent phenotype is a decline in naïve T cell numbers, which correlates with increased  
175 morbidity and mortality (32, 33). Notably, the 54-wo mice had significantly decreased absolute  
176 numbers of CD4 and CD8 cells in the blood and spleen in comparison with younger animals (Fig.  
177 2A). This reduction was due to the decline of naïve subpopulations of CD4 and CD8 cells, while  
178 effector T cell numbers were increased in 54- and 22-wo mice in comparison with the 7-wo group  
179 (Fig. 2B, Suppl. Fig. 5).

### 180 **3.1 Immune response to intradermal infection with VACV is conserved across different age** 181 **groups**

182 Intradermal (i.d) infection with VACV leads to the development of skin lesions 5-6 days (d) post  
183 infection that usually heal within 21 d (26). Using this infection model, immune cell recruitment, the  
184 levels of cytokines/chemokines and the viral load in ear tissues 7 d post i.d. infection was analyzed in  
185 three different age groups of mice.

186 FACS analysis of leukocyte populations in the infected ear showed that ~97% represented cells that  
187 had infiltrated into the tissue, whereas immune cells from blood circulation constituted only 3% of  
188 the total leukocytes (Suppl. Fig. 7). In comparison with 7- and 22-wo mice, infected ear tissues of 54-  
189 wo animals showed significantly less infiltration of different leukocyte populations including NK,  
190 CD4 and CD8 T cells, Ly6C<sup>+</sup> (inflammatory) monocytes and CD45<sup>+</sup>CD3<sup>+</sup>CD5<sup>+</sup>CD19<sup>+</sup>NK1.1<sup>+</sup>Siglec-  
191 F<sup>+</sup>CD11c<sup>+</sup> cells, which represent a mixed population of dendritic cells and macrophages (Fig 3A).  
192 The presence of VACV-specific CD8 T cells in infected ear tissue of 54-wo mice was also reduced  
193 compared to the other groups (Fig. 3B). Given that amounts of CD4 and CD8 T cells in the elderly  
194 mice were diminished before the infection (Fig. 2), the lower numbers of lymphoid populations  
195 infiltrating ears are likely reflective of the reduced availability of T cells in the blood circulation.

196 The levels of cytokines and chemokines detected in ear tissue of the old animals at 7 d after i.d.  
197 infection did not differ greatly from the young and middle-age groups (Fig. 3C). Only the levels of  
198 IL-10 and CCL5 were reduced, while the concentrations of TNF $\alpha$  and IL-6 were increased in 54-wo  
199 mice in comparison with 7- and 22-wo animals. However, the amplitude of these changes did not  
200 exceed 2-fold. In addition, viral loads in infected ear tissues were similar in all groups (Fig. 3D).  
201 Hence, the infected ear tissue was able to respond to the infection via production of inflammatory  
202 mediators and control virus infection to equivalent levels across all age groups. These data provide  
203 further evidence that the lower cell recruitment into the ear tissue of 54-wo mice was likely due to the

204 reduced availability of circulating cells rather than due to changes in local responses in the infected  
205 tissue. Thus, functionally, the immune response to i.d. vaccination with VACV was preserved in 54-  
206 wo mice, and the ability to control VACV replication at the site of infection was equal across 7-, 22-  
207 and 54-wo groups.

### 208 **3.2 54-week old mice have enhanced cytokine response to intradermal VACV infection in** 209 **draining lymph nodes**

210 To investigate the effect of age on the adaptive immune response to vaccination with VACV, cervical  
211 draining lymph nodes (dLN) were analyzed at 7 d post i.d. infection. This showed a trend in  
212 reduction of absolute numbers of VACV-specific CD8 T cells in the 54-wo mice in comparison with  
213 22- and 7-wo groups (Fig. 4A). However, the amounts of germinal center (GC) B cells and T  
214 follicular helper (Tfh) lymphocytes were not significantly different between all groups (Fig. 4B, C).

215 Next, the levels of cytokines and chemokines in dLN were measured at 7 d post vaccination.  
216 Amongst 17 different molecules assessed, IFN $\gamma$ , IL-33, CCL2, CCL3, CCL4, CCL5, CCL7 and  
217 CXCL1 were detectable (Fig. 4D) and the levels of IFN $\gamma$ , CCL2 and CCL5 were significantly higher  
218 in 54-wo animals than in younger mice, while the others were similar in all groups. Thus, the dLNs  
219 of old animals responded well to VACV vaccination, expressing high levels of inflammatory  
220 mediators and generating appropriate cellular adaptive immune responses.

### 221 **3.3 VACV vaccination induces strong adaptive immune response in mice of different ages**

222 Next, we compared the cellular and humoral memory responses induced by vaccination with VACV.  
223 Splens and blood samples were obtained from mice 29 d post vaccination of 7-, 22- and 54-wo as  
224 well as from mock-vaccinated animals. The total numbers of splenic CD8 T cells were equivalent  
225 within the three vaccinated groups, while the absolute numbers of CD4 T cells were slightly reduced  
226 in 54-wo mice in comparison with in 7- and 22-wo groups (Fig. 5A). The most pronounced changes  
227 in numbers of splenic CD8 and CD4 T subsets were observed for effector T cells. In comparison with  
228 baseline parameters before vaccination, effector CD8 and CD4 T lymphocytes increased  
229 considerably as a result of vaccination for all groups of mice (Fig. 2B, Fig. 5B). Notably, effector T  
230 cells in the 54-wo group expanded proportionally greater than in younger groups. However, analysis  
231 of VACV-specific CD8 T cells showed that their absolute counts were comparable within all age  
232 groups (Fig. 5C). As for the humoral immune response, the ability of serum to neutralize VACV was  
233 identical in all three groups (Fig. 5D). These observations show that vaccination with VACV  
234 generates memory immunity in 54-wo mice that is quantitatively indistinguishable from that generated  
235 in 7- or 22-wo mice.

### 236 **3.4 54-week old mice are better protected against VACV intranasal challenge than those** 237 **from younger groups**

238 To measure the ability of vaccinated groups to respond to re-infection, the three age groups of  
239 vaccinated animals and young naïve mice were challenged i.n. with a dose of VACV equivalent to ~  
240 300 LD50. All vaccinated groups had mild or moderate weight loss (about 15% maximum) after  
241 challenge followed by full recovery. In contrast, naïve mock-vaccinated mice had >25% weight loss  
242 and were culled at humane endpoint (Fig. 6A). Notably, following challenge, the 54-wo mice lost  
243 less body weight and recovered faster than young and middle-aged groups. Results of viral load  
244 measurement in the lungs of challenged mice indicated that the 54-wo mice cleared the virus faster  
245 than other groups (Fig. 6B). For the majority of immunized elderly mice, no VACV genome copies  
246 were detected in lungs at 24 h post i.n. challenge. Interestingly, the 22-wo mice were slower than 7-

247 and 54-wo groups at clearing the virus, despite the weight loss post challenge being similar between  
248 the 7- and 22-wo groups (Fig. 6A, B).

249 Lastly, the levels of inflammatory mediators in the lung tissue of vaccinated and naïve mice were  
250 measured (Fig. 7, Suppl. Fig. 9). Baseline levels before i.n. infection did not vary significantly  
251 between groups. In comparison with the naïve mice, all vaccinated animals responded very quickly to  
252 i.n. infection. At just 12 h post-challenge, the levels of IFN $\gamma$ , CCL7, CXCL1, CXCL2, CXCL10 rose  
253 substantially (Suppl. Fig. 9), although there was little variation between the different age groups.  
254 Only CXCL1 was increased in the elderly mice, and IFN $\gamma$  levels tended to be higher in the old and  
255 middle-aged mice than in young animals. At 24 h post infection, the majority of lung cytokines and  
256 chemokines were reduced in the elderly mice compared with other vaccinated age groups. Moreover,  
257 at 48 h after challenge, the levels of inflammatory mediators in the 54-wo group were decreased  
258 further and started returning to their initial (baseline) concentrations. This may reflect the faster virus  
259 clearance. Therefore, the results of weight loss measurement, viral load and cytokine dynamics in  
260 lungs indicate that mice vaccinated at the age of 54-wo had robust protection against reinfection with  
261 a lethal dose of VACV, and this protection was even stronger than in the mice vaccinated when 7-  
262 and 22-wo.

#### 263 4 Discussion

264 In the current study, we show that i.d. vaccination with VACV leads to successful development of  
265 immunological memory in old mice bearing an immunosenescent phenotype. Surprisingly, despite a  
266 general reduction of naïve CD8 and CD4 cells (Fig. 2), reduced recruitment of immune cells into the  
267 site of i.d. infection (Fig. 3A, B) and inflammatory signatures characteristic of a phenomenon  
268 sometimes known as inflammaging (Fig. 3C and 4D), 54-week-old mice demonstrated better  
269 vaccination efficacy against challenge than the younger animals.

270 Vaccination of humans with VACV results in long lasting immunological memory even after  
271 administration of a single dose of vaccine (23, 24, 34), and its high efficacy has been validated by the  
272 eradication of smallpox. Little information is available concerning VACV vaccine performance in  
273 elderly people or mice. One study has reported that vaccination of aged BALB/c mice with  
274 recombinant VACV expressing influenza hemagglutinin was effective in generating anti-  
275 hemagglutinin antibodies and influenza-specific cytotoxic T cells (35). The basis of high  
276 immunogenicity of VACV is not known. However, local immunosuppression by VACV allows the  
277 virus to replicate at the site of infection for at least 12 d post i.d. vaccination (26). This extended  
278 replication period provides constant antigen exposure to the immune system, probably facilitating the  
279 generation of strong immunological memory. This immune suppression may be mediated by the  
280 scores of immune modulatory proteins expressed by VACV early after infection (21, 36). Many  
281 VACV immunomodulators target pattern recognition receptor and interferon receptor signaling to  
282 block anti-viral responses in infected cells. In vaccination models, deletion of two or three such genes  
283 leads to enhanced safety but decreased immunogenicity of vaccine and impaired protection against  
284 challenge (28). The highly attenuated VACV strain modified vaccinia Ankara (MVA), which is  
285 replication deficient in many cell types, results in the generation of significantly lower antibody titers  
286 in comparison with WR (37, 38). This may explain the potency of VACV in developing robust  
287 immunological memory even in old mice. However, this does not explain why better protection  
288 against challenge was observed in older mice than in younger counterparts.

289 One of the features of the immune system in the elderly is the presence of chronic, low grade  
290 inflammation, which is sometimes called inflammaging (39). The characteristics of this phenomenon

291 are upregulated activity of NF- $\kappa$ B (40, 41), increased levels of proinflammatory cytokines and  
292 chemokines such as TNF $\alpha$ , IL-1, IL-6, IL-8, IL-12, CCL2, CXCL10 (42), accumulation of damage-  
293 associated molecular patterns and dysfunctional organelles (43), as well as changes in gut microbiota  
294 and metabolism (44). This phenomenon may go some way in explaining the enhanced production of  
295 NF- $\kappa$ B-regulated cytokines TNF $\alpha$  and IL-6 in the VACV-infected ear tissue of 54-wo mice (Fig. 3C)  
296 as well as CCL2 in dLNs (Fig. 4D). IL-6 and TNF superfamily ligands act as adjuvants and increase  
297 immunogenicity of vaccines (45, 46). Therefore, in the case of VACV vaccination, inflammaging  
298 might be beneficial by providing additional pro-inflammatory stimulus to drive the cascade of events  
299 leading to immune memory development.

300 Increased production of TNF $\alpha$  and IL-6 along with low levels of IL-10 (Fig. 3C) in old animals after  
301 i.d. vaccination, might compensate for the reduced recruitment of immune cells into the vaccination  
302 site (Fig. 3A). This might contribute to the control of virus infection after i.d. infection (Fig. 3D) and  
303 provide adequate conditions for the generation of immunological memory. Notably, the numbers of  
304 Tfh and GC B cells in dLN (Fig. 4B, C), as well as VACV-specific CD8 T cells in the spleen and  
305 neutralizing antibody levels (Fig. 5C, D), were similar across all age groups. Nonetheless, it is  
306 unclear how the old mice achieved faster clearance of VACV and reduced weight loss after challenge  
307 (Fig. 6A, B).

308 Our results show that absolute counts of splenic effector CD8 T cells expanded substantially and  
309 proportionally higher in the elderly group than in the younger mice (Fig. 2B and 5B). This cannot be  
310 explained simply by the increased numbers of splenic VACV-specific CD8 T cells (that have been  
311 identified by MHC-I dextramer staining) because their absolute counts are too low and similar across  
312 all three age groups (Fig. 5C). This difference might be due to the expansion of VACV-specific CD8  
313 T cells against different VACV epitopes and/or the expansion of low-affinity CD8 T cells, which  
314 have not been recognized by the type of MHC-I dextramers used in this study. These cells may  
315 contribute to the rapid clearance of VACV in the elderly after challenge. Also, despite numerous  
316 publications describing functional inefficiency of senescent effector T cells, there are reports that  
317 effector T cells from elderly people can have superior immune response to antigen stimulation than  
318 younger counterparts (47–49).

319 In conclusion, this study demonstrates that vaccination of elderly mice is very efficient and not  
320 inferior to younger animals. Immunosenescence and inflammaging may be more accurately viewed  
321 as immunoadaptation and immunoremodeling in old age, rather than just a slow decline in immune  
322 system function (50, 51). The majority of vaccines were created for, and are used in, children and  
323 young adults (6), and vaccines designed for the elderly population are needed that consider the  
324 specific characteristics of immune system in old age. Given the performance of VACV vaccination  
325 shown in the current study, further investigation to understand the mechanisms of its high  
326 immunogenicity is warranted.

## 327 **5 Ethics Statement**

328 This study was carried out in accordance with the regulations of The Animals (Scientific Procedures)  
329 Act 1986. All protocols and procedures were approved by the UK Home Office and performed under  
330 the project licence PPL 70/8524.

## 331 **6 Conflict of Interest**



332 The authors declare that the research was conducted in the absence of any commercial or financial  
333 relationships that could be construed as a potential conflict of interest.

## 334 **7 Author Contributions**

335 GS and BF provided the funding. ES, GS and BF designed the study. ES performed all experiments  
336 and statistical analysis. GS and BF supervised the work. ES, BF and GS wrote the manuscript.

## 337 **8 Funding**

338 The study was supported by MRC project grant RG77505 to GLS and BF. GS is a Wellcome Trust  
339 Principal Research Fellow.

## 340 **9 Acknowledgments**

341 We thank Dr Brian M Ward (University of Rochester Medical Center, USA) for providing a plasmid  
342 containing the VACV *E9L* gene. Also, we thank Dr Michelle A Linterman from the Babraham  
343 Institute, Cambridge, UK for helpful discussion.

## 344 **10 Data Availability Statement**

345 Raw data supporting the conclusions of this manuscript will be made available by the authors,  
346 without undue reservation, to any qualified researcher.

## 347 **11 References**

- 348 1. Hepper, H. J., Sieber, C., Cornel, S., Walger, P., Peter, W., Bahrmann, P. et al. Infections in the  
349 elderly. *Crit Care Clin* (2013) 29(3):757-774. doi:10.1016/j.ccc.2013.03.016.
- 350 2. Haq, K., and McElhaney, J. E. Ageing and respiratory infections: the airway of ageing. *Immunol*  
351 *Lett* (2014) 162(1 Pt B):323-328. doi:10.1016/j.imlet.2014.06.009.
- 352 3. Kline, K. A., and Bowdish, D. M. Infection in an aging population. *Curr Opin Microbiol* (2016)  
353 2963-67. doi:10.1016/j.mib.2015.11.003.
- 354 4. Weinberger, B. Vaccines for the elderly: current use and future challenges. *Immun Ageing*  
355 (2018) 153. doi:10.1186/s12979-017-0107-2.
- 356 5. Chen, W. H., Kozlovsky, B. F., Effros, R. B., Grubeck-Loebenstien, B., Edelman, R., and Szein,  
357 M. B. Vaccination in the elderly: an immunological perspective. *Trends Immunol* (2009)  
358 30(7):351-359. doi:10.1016/j.it.2009.05.002.
- 359 6. Ciabattini, A., Nardini, C., Santoro, F., Garagnani, P., Franceschi, C., and Medaglini, D.  
360 Vaccination in the elderly: The challenge of immune changes with aging. *Semin Immunol* (2018)  
361 4083-94. doi:10.1016/j.smim.2018.10.010.
- 362 7. Goodwin, K., Viboud, C., and Simonsen, L. Antibody response to influenza vaccination in the  
363 elderly: a quantitative review. *Vaccine* (2006) 24(8):1159-1169.  
364 doi:10.1016/j.vaccine.2005.08.105.
- 365 8. Tin Tin Htar, M., Stuurman, A. L., Ferreira, G., Alicino, C., Bollaerts, K., Paganino, C. et al.  
366 Effectiveness of pneumococcal vaccines in preventing pneumonia in adults, a systematic review  
367 and meta-analyses of observational studies. *PLoS One* (2017) 12(5):e0177985.  
368 doi:10.1371/journal.pone.0177985.
- 369 9. Weston, W. M., Friedland, L. R., Wu, X., and Howe, B. Vaccination of adults 65 years of age  
370 and older with tetanus toxoid, reduced diphtheria toxoid and acellular pertussis vaccine

- 371 (Boostrix®): results of two randomized trials. *Vaccine* (2012) 30(9):1721-1728.  
372 doi:10.1016/j.vaccine.2011.12.055.
- 373 10. Yang, S., Tian, G., Cui, Y., Ding, C., Deng, M., Yu, C. et al. Factors influencing immunologic  
374 response to hepatitis B vaccine in adults. *Sci Rep* (2016) 627251. doi:10.1038/srep27251.
- 375 11. Goronzy, J. J., and Weyand, C. M. Understanding immunosenescence to improve responses to  
376 vaccines. *Nat Immunol* (2013) 14(5):428-436. doi:10.1038/ni.2588.
- 377 12. Solana, R., Pawelec, G., and Tarazona, R. Aging and innate immunity. *Immunity* (2006)  
378 24(5):491-494. doi:10.1016/j.immuni.2006.05.003.
- 379 13. Molony, R. D., Malawista, A., and Montgomery, R. R. Reduced dynamic range of antiviral  
380 innate immune responses in aging. *Exp Gerontol* (2018) 107130-135.  
381 doi:10.1016/j.exger.2017.08.019.
- 382 14. Gomez, C. R., Nomellini, V., Faunce, D. E., and Kovacs, E. J. Innate immunity and aging. *Exp*  
383 *Gerontol* (2008) 43(8):718-728. doi:10.1016/j.exger.2008.05.016.
- 384 15. Metcalf, T. U., Cubas, R. A., Ghneim, K., Cartwright, M. J., Grevenynghe, J. V., Richner, J. M.  
385 et al. Global analyses revealed age-related alterations in innate immune responses after  
386 stimulation of pathogen recognition receptors. *Aging Cell* (2015) 14(3):421-432.  
387 doi:10.1111/acel.12320.
- 388 16. Shaw, A. C., Goldstein, D. R., and Montgomery, R. R. Age-dependent dysregulation of innate  
389 immunity. *Nat Rev Immunol* (2013) 13(12):875-887. doi:10.1038/nri3547.
- 390 17. Henry, C., Zheng, N. Y., Huang, M., Cabanov, A., Rojas, K. T., Kaur, K. et al. Influenza Virus  
391 Vaccination Elicits Poorly Adapted B Cell Responses in Elderly Individuals. *Cell Host Microbe*  
392 (2019) 25(3):357-366.e6. doi:10.1016/j.chom.2019.01.002.
- 393 18. Moss, B. (2013), Poxviridae, in *Fields Virology*, edited by B. N. Fields, D. M. Knipe, and P. M.  
394 Howley, pp. 2129-2159, Philadelphia : Wolters Kluwer Health/Lippincott Williams & Wilkins,
- 395 19. Fenner, F., D. A. Henderson, I. Arita, Z. Jezek, and I. D. Ladnyi (1988), *Smallpox and its*  
396 *eradication*, 1460 pp., World Health Organization,
- 397 20. Goebel, S. J., Johnson, G. P., Perkus, M. E., Davis, S. W., Winslow, J. P., and Paoletti, E. The  
398 complete DNA sequence of vaccinia virus. *Virology* (1990) 179(1):247-66, 517.
- 399 21. Smith, G. L., Benfield, C. T., Maluquer de Motes, C., Mazzon, M., Ember, S. W., Ferguson, B.  
400 J. et al. Vaccinia virus immune evasion: mechanisms, virulence and immunogenicity. *J Gen*  
401 *Virol* (2013) 94(Pt 11):2367-2392. doi:10.1099/vir.0.055921-0.
- 402 22. Belyakov, I. M., Earl, P., Dzutsev, A., Kuznetsov, V. A., Lemon, M., Wyatt, L. S. et al. Shared  
403 modes of protection against poxvirus infection by attenuated and conventional smallpox vaccine  
404 viruses. *Proc Natl Acad Sci U S A* (2003) 100(16):9458-9463. doi:10.1073/pnas.1233578100.
- 405 23. Crotty, S., Felgner, P., Davies, H., Glidewell, J., Villarreal, L., and Ahmed, R. Cutting edge:  
406 long-term B cell memory in humans after smallpox vaccination. *J Immunol* (2003)  
407 171(10):4969-4973.
- 408 24. Taub, D. D., Ershler, W. B., Janowski, M., Artz, A., Key, M. L., McKelvey, J. et al. Immunity  
409 from smallpox vaccine persists for decades: a longitudinal study. *Am J Med* (2008)  
410 121(12):1058-1064. doi:10.1016/j.amjmed.2008.08.019.
- 411 25. Xu, R., Johnson, A. J., Liggitt, D., and Bevan, M. J. Cellular and humoral immunity against  
412 vaccinia virus infection of mice. *J Immunol* (2004) 172(10):6265-6271.
- 413 26. Tschärke, D. C., and Smith, G. L. A model for vaccinia virus pathogenesis and immunity based  
414 on intradermal injection of mouse ear pinnae. *J Gen Virol* (1999) 80(Pt 10):2751-2755.  
415 doi:10.1099/0022-1317-80-10-2751.
- 416 27. Sumner, R. P., Ren, H., and Smith, G. L. Deletion of immunomodulator C6 from vaccinia virus  
417 strain Western Reserve enhances virus immunogenicity and vaccine efficacy. *J Gen Virol* (2013)  
418 94(Pt 5):1121-1126. doi:10.1099/vir.0.049700-0.

- 419 28. Sumner, R. P., Ren, H., Ferguson, B. J., and Smith, G. L. Increased attenuation but decreased  
420 immunogenicity by deletion of multiple vaccinia virus immunomodulators. *Vaccine* (2016)  
421 34(40):4827-4834. doi:10.1016/j.vaccine.2016.08.002.
- 422 29. Anderson, K. G., Mayer-Barber, K., Sung, H., Beura, L., James, B. R., Taylor, J. J. et al.  
423 Intravascular staining for discrimination of vascular and tissue leukocytes. *Nat Protoc* (2014)  
424 9(1):209-222. doi:10.1038/nprot.2014.005.
- 425 30. Baker, J. L., and Ward, B. M. Development and comparison of a quantitative TaqMan-MGB  
426 real-time PCR assay to three other methods of quantifying vaccinia virions. *J Virol Methods*  
427 (2014) 196126-132. doi:10.1016/j.jviromet.2013.10.026.
- 428 31. Ren, H., Ferguson, B. J., Maluquer de Motes, C., Sumner, R. P., Harman, L. E., and Smith, G. L.  
429 Enhancement of CD8(+) T-cell memory by removal of a vaccinia virus nuclear factor- $\kappa$ B  
430 inhibitor. *Immunology* (2015) 145(1):34-49. doi:10.1111/imm.12422.
- 431 32. Lynch, H. E., Goldberg, G. L., Chidgey, A., Van den Brink, M. R., Boyd, R., and Sempowski,  
432 G. D. Thymic involution and immune reconstitution. *Trends Immunol* (2009) 30(7):366-373.  
433 doi:10.1016/j.it.2009.04.003.
- 434 33. Youm, Y. H., Horvath, T. L., Mangelsdorf, D. J., Kliewer, S. A., and Dixit, V. D. Prolongevity  
435 hormone FGF21 protects against immune senescence by delaying age-related thymic involution.  
436 *Proc Natl Acad Sci U S A* (2016) 113(4):1026-1031. doi:10.1073/pnas.1514511113.
- 437 34. Pütz, M. M., Alberini, I., Midgley, C. M., Manini, I., Montomoli, E., and Smith, G. L.  
438 Prevalence of antibodies to Vaccinia virus after smallpox vaccination in Italy. *J Gen Virol* (2005)  
439 86(Pt 11):2955-2960. doi:10.1099/vir.0.81265-0.
- 440 35. Ben-Yehuda, A., Ehleiter, D., Hu, A. R., and Weksler, M. E. Recombinant vaccinia virus  
441 expressing the PR/8 influenza hemagglutinin gene overcomes the impaired immune response and  
442 increased susceptibility of old mice to influenza infection. *J Infect Dis* (1993) 168(2):352-357.
- 443 36. Albarnaz, J. D., Torres, A. A., and Smith, G. L. Modulating Vaccinia Virus Immunomodulators  
444 to Improve Immunological Memory. *Viruses* (2018) 10(310.3390/v10030101).
- 445 37. de Freitas, L. F. D., Oliveira, R. P., Miranda, M. C. G., Rocha, R. P., Barbosa-Stancioli, E. F.,  
446 Faria, A. M. C. et al. The Virulence of Different Vaccinia Virus Strains Is Directly Proportional  
447 to Their Ability To Downmodulate Specific Cell-Mediated Immune Compartments. *J Virol*  
448 (2019) 93(610.1128/JVI.02191-18).
- 449 38. Ramírez, J. C., Gherardi, M. M., and Esteban, M. Biology of attenuated modified vaccinia virus  
450 Ankara recombinant vector in mice: virus fate and activation of B- and T-cell immune responses  
451 in comparison with the Western Reserve strain and advantages as a vaccine. *J Virol* (2000)  
452 74(2):923-933.
- 453 39. Frasca, D., and Blomberg, B. B. Inflammaging decreases adaptive and innate immune responses  
454 in mice and humans. *Biogerontology* (2016) 17(1):7-19. doi:10.1007/s10522-015-9578-8.
- 455 40. Bektas, A., Schurman, S. H., Sen, R., and Ferrucci, L. Human T cell immunosenescence and  
456 inflammation in aging. *J Leukoc Biol* (2017) 102(4):977-988. doi:10.1189/jlb.3RI0716-335R.
- 457 41. Tilstra, J. S., Clauson, C. L., Niedernhofer, L. J., and Robbins, P. D. NF- $\kappa$ B in Aging and  
458 Disease. *Aging Dis* (2011) 2(6):449-465.
- 459 42. Minciullo, P. L., Catalano, A., Mandraffino, G., Casciaro, M., Crucitti, A., Maltese, G. et al.  
460 Inflammaging and Anti-Inflammaging: The Role of Cytokines in Extreme Longevity. *Arch*  
461 *Immunol Ther Exp (Warsz)* (2016) 64(2):111-126. doi:10.1007/s00005-015-0377-3.
- 462 43. Franceschi, C., Garagnani, P., Vitale, G., Capri, M., and Salvioli, S. Inflammaging and 'Garb-  
463 aging'. *Trends Endocrinol Metab* (2017) 28(3):199-212. doi:10.1016/j.tem.2016.09.005.
- 464 44. Franceschi, C., Garagnani, P., Parini, P., Giuliani, C., and Santoro, A. Inflammaging: a new  
465 immune-metabolic viewpoint for age-related diseases. *Nat Rev Endocrinol* (2018) 14(10):576-  
466 590. doi:10.1038/s41574-018-0059-4.

- 467 45. Gupta, S., Termini, J. M., Kanagavelu, S., and Stone, G. W. Design of vaccine adjuvants  
468 incorporating TNF superfamily ligands and TNF superfamily molecular mimics. *Immunol Res*  
469 (2013) 57(1-3):303-310. doi:10.1007/s12026-013-8443-6.
- 470 46. Luo, J., Zhang, B., Wu, Y., Tian, Q., Zhao, J., Lyu, Z. et al. Expression of interleukin-6 by a  
471 recombinant rabies virus enhances its immunogenicity as a potential vaccine. *Vaccine* (2017)  
472 35(6):938-944. doi:10.1016/j.vaccine.2016.12.069.
- 473 47. Chen, G., Lustig, A., and Weng, N. P. T cell aging: a review of the transcriptional changes  
474 determined from genome-wide analysis. *Front Immunol* (2013) 4121.  
475 doi:10.3389/fimmu.2013.00121.
- 476 48. Vescovini, R., Biasini, C., Fagnoni, F. F., Telera, A. R., Zanlari, L., Pedrazzoni, M. et al.  
477 Massive load of functional effector CD4+ and CD8+ T cells against cytomegalovirus in very old  
478 subjects. *J Immunol* (2007) 179(6):4283-4291.
- 479 49. Weng, N. P., Akbar, A. N., and Goronzy, J. CD28(-) T cells: their role in the age-associated  
480 decline of immune function. *Trends Immunol* (2009) 30(7):306-312.  
481 doi:10.1016/j.it.2009.03.013.
- 482 50. Franceschi, C., Salvioli, S., Garagnani, P., de Eguileor, M., Monti, D., and Capri, M.  
483 Immunobiography and the Heterogeneity of Immune Responses in the Elderly: A Focus on  
484 Inflammaging and Trained Immunity. *Front Immunol* (2017) 8982.  
485 doi:10.3389/fimmu.2017.00982.
- 486 51. Fulop, T., Larbi, A., Dupuis, G., Le Page, A., Frost, E. H., Cohen, A. A. et al.  
487 Immunosenescence and Inflamm-Aging As Two Sides of the Same Coin: Friends or Foes. *Front*  
488 *Immunol* (2017) 81960. doi:10.3389/fimmu.2017.01960.  
489

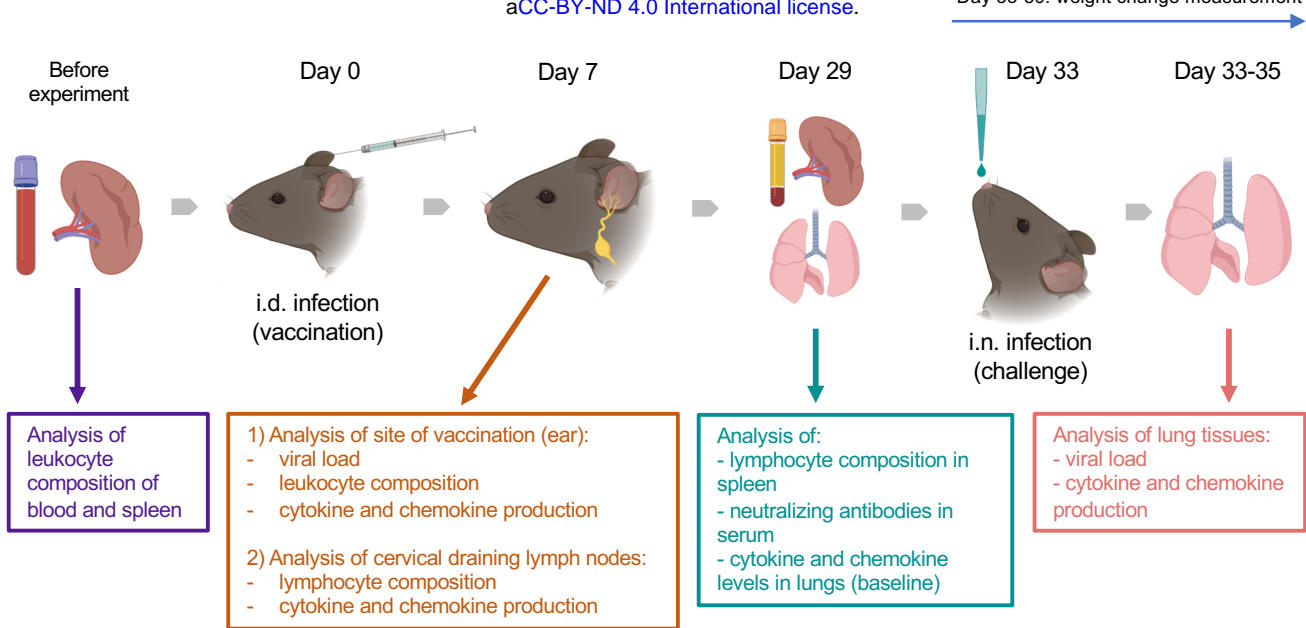

**Figure 1. Experimental design.** Groups ( $n=4-5$ ) of 7-, 22- and 54-week old C57BL/6 mice were used in the study. Various parameters were measured before and at 7 and 29 d after intradermal (i.d.) infection with  $10^4$  PFU of VACV WR, as well as following intranasal (i.n.) challenge of immunised or naïve mice with  $\sim 10^7$  PFU of VACV WR.

**A**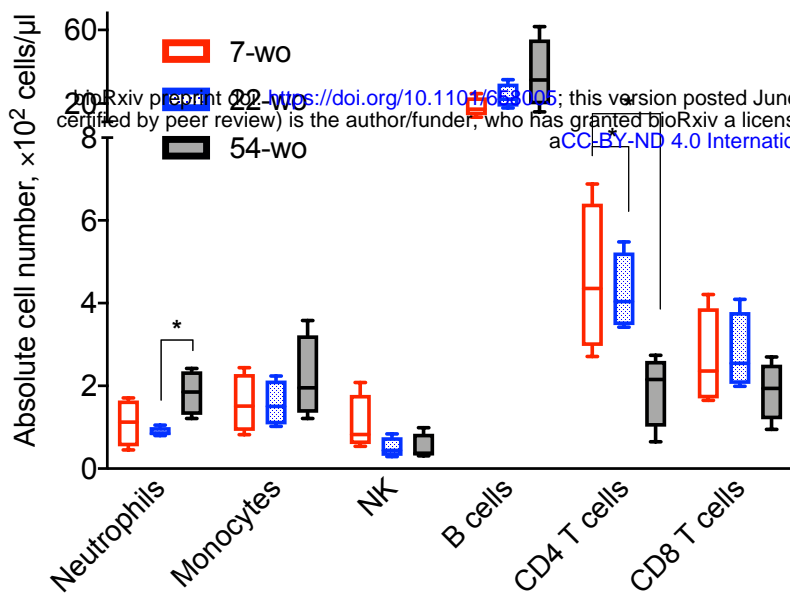**B**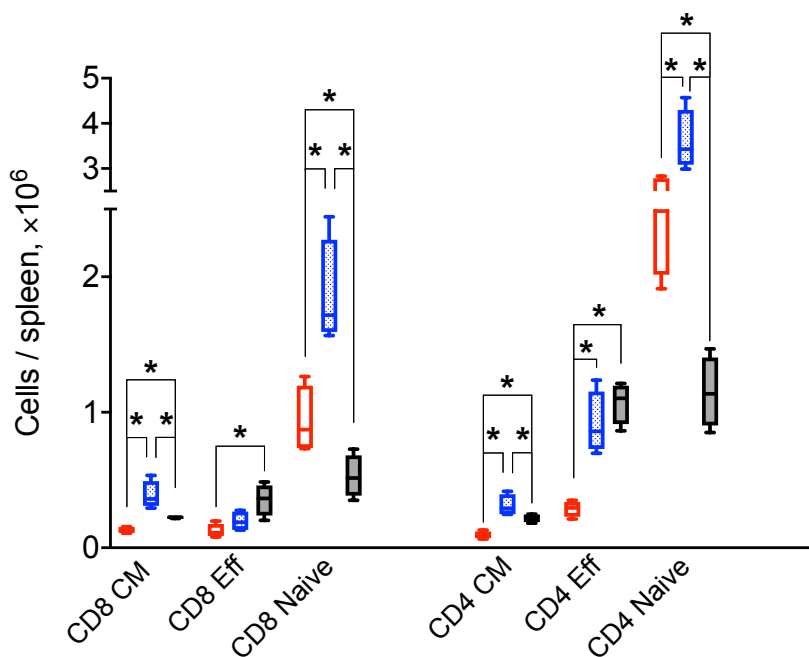

**Figure 2. Old mice have decreased numbers of naïve CD8 and CD4 T cells.** The absolute numbers of different subpopulation of leukocytes in blood (**A**) and T cells isolated from the spleen (**B**) of 7-, 22- and 54-week old mice (without VACV infection) (4 animals per group). CM, central memory; Eff, effector. P values determined by Mann-Whitney test, \* =  $p < 0.05$ .

**A**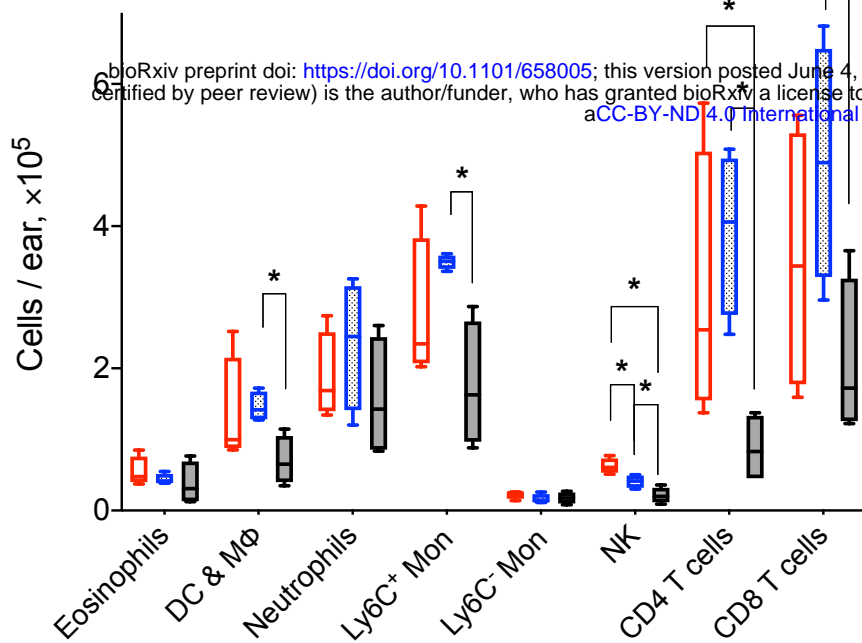**B**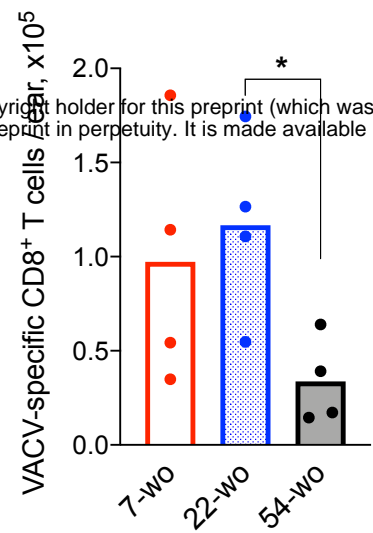**C**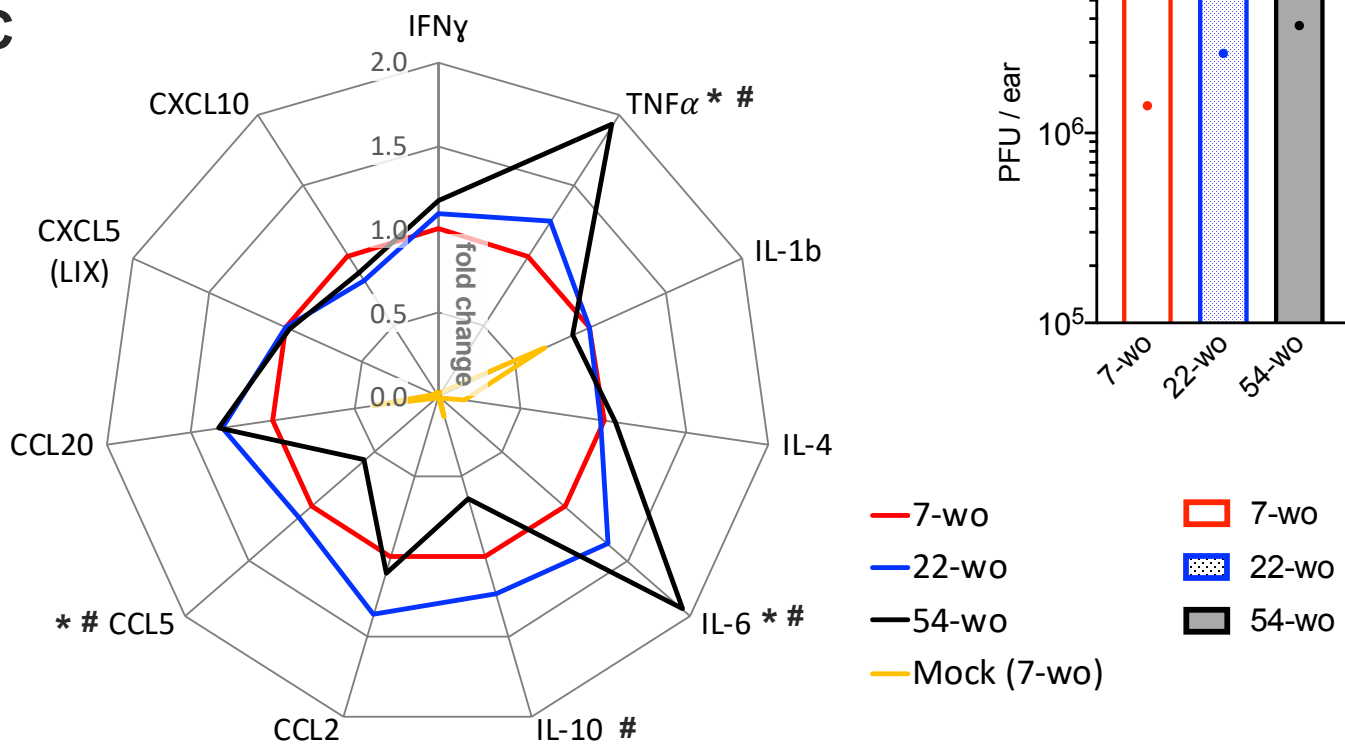**D**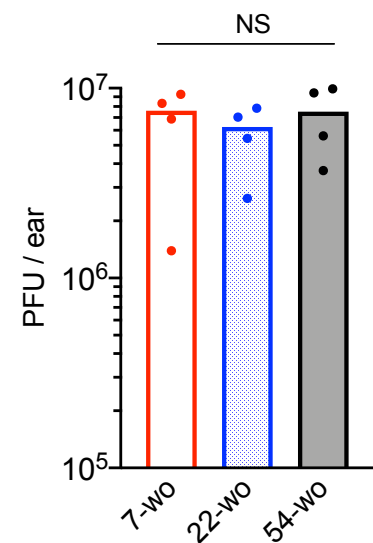

**Figure 3. Conservation of the immune response to intradermal infection with VACV across age groups.** Ear tissues were collected at 7 d post i.d. infection with VACV or PBS (mock-control) from groups of 7-, 22- and 54-wo mice ( $n=4-5$  per group). The absolute numbers of (A) different subpopulations of leukocytes and (B) VACV-specific CD8 T cells infiltrating ear tissues are shown. DC & MΦ, dendritic cells and macrophages; Mon, monocytes; p values were determined by the Mann-Whitney test, \* =  $p < 0.05$ . (C) The levels of cytokines/chemokines detected by multiplex assay (Luminex) in ear tissues are presented as fold change compared with the 7-wo VACV-infected group, which is assigned a value of 1. The means are shown; p values were determined by the Mann-Whitney test, \* =  $p < 0.05$  between 7- and 54-wo animals. # =  $p < 0.05$  between 22- and 54-wo mice. (D) Titers of VACV in ear tissues at 7 d post i.d. infection with VACV. PFU, plaque-forming units; NS – non-significant by Mann-Whitney test. The experiment was performed twice and representative data from one experiment are shown.

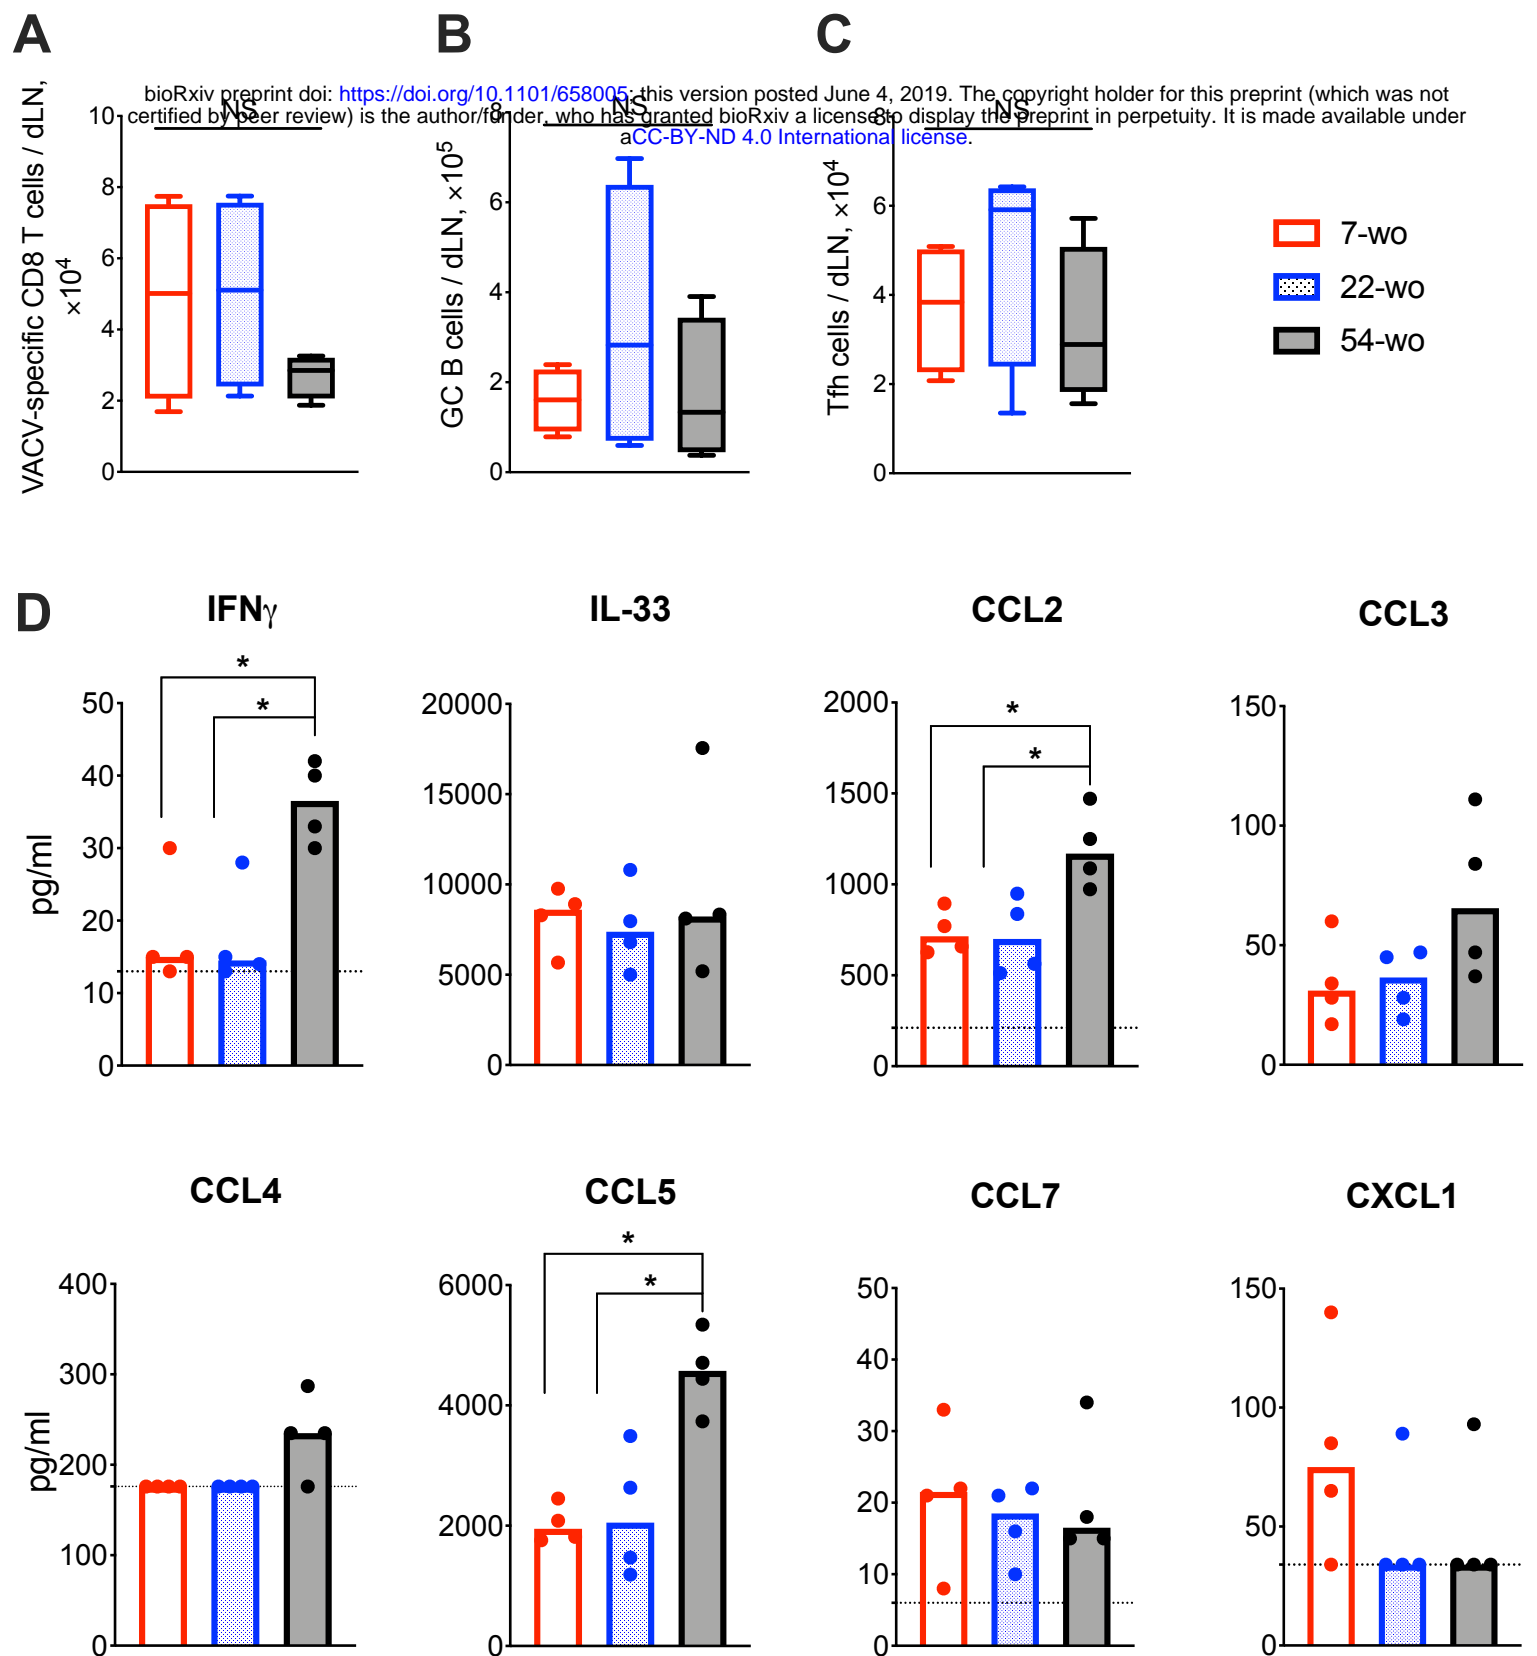

**Figure 4. Enhanced cytokine production in the draining lymph nodes (dLN) of 54-wo mice following intradermal infection with VACV.** Groups of 7-, 22- and 54-wo mice ( $n=4-5$  per group) were infected i.d. with VACV and at 7 d post infection the dLN were collected. The absolute number of (A) VACV-specific CD8 T cells, (B) germinal center B cells and (C) T follicular helper cells were determined by FACS. GC, germinal center; Tfh, T follicular helper; NS, non-significant by Mann-Whitney test. (D) The levels of cytokines and chemokines were detected by multiplex assay (Luminex) in cervical dLN from mice treated as above. Medians are shown; dashed lines indicate limit of sensitivity; p values were determined by the Mann-Whitney test, \* =  $p < 0.05$ . The experiment was performed twice and representative data from one experiment are shown.



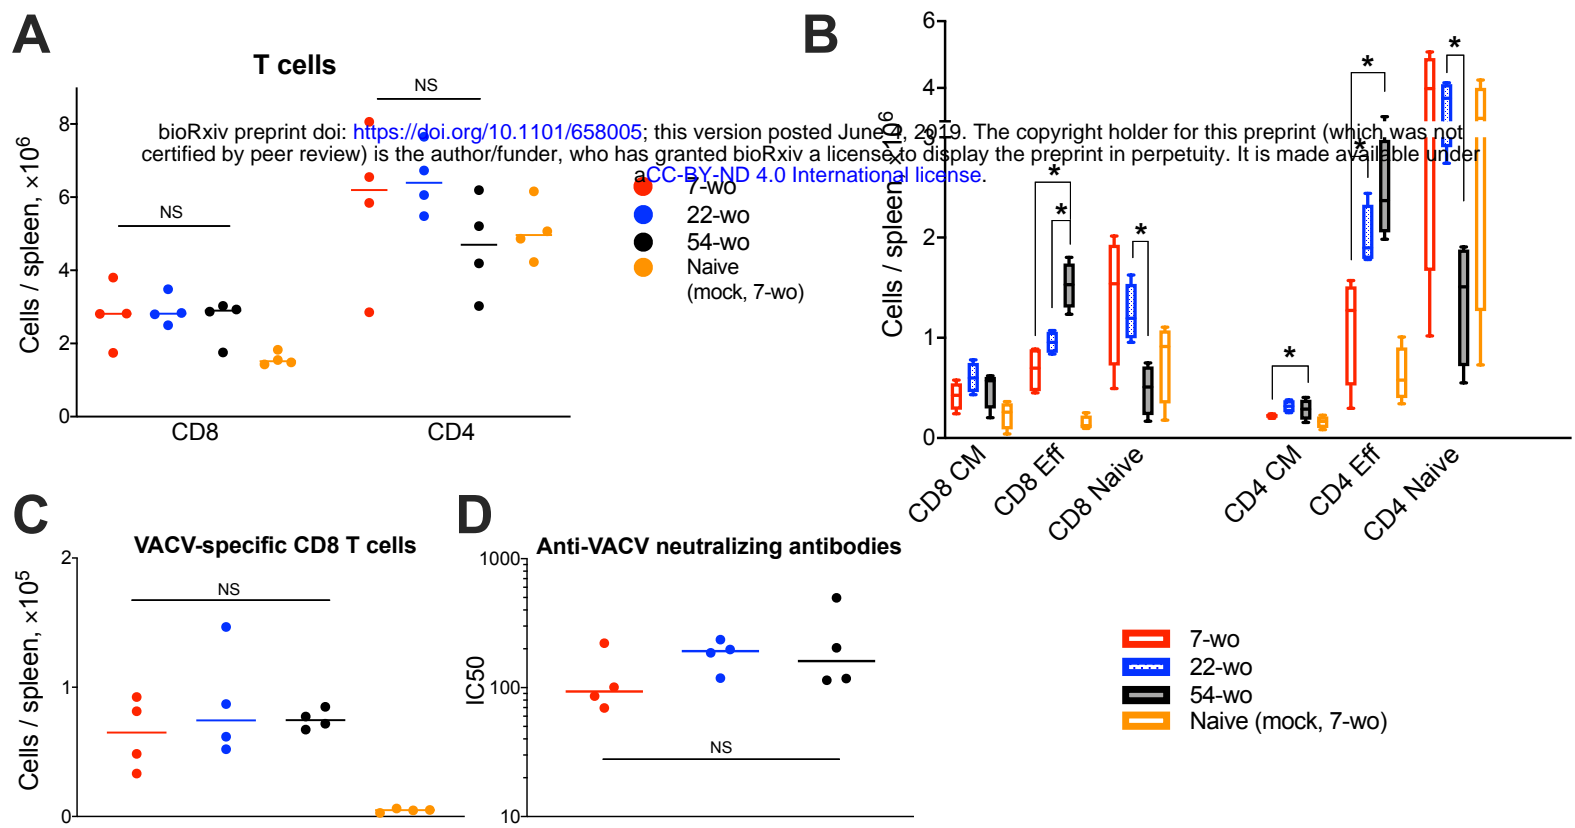

**Figure 5. Vaccination with VACV induces a robust adaptive immune response in mice of different ages.** Spleens and serum samples were obtained from vaccinated and naïve (mock-vaccinated) mice of different ages at 29 d post i.d. injection ( $n=4-5$  animals per group). **(A)** The absolute numbers of total splenic CD8 and CD4 T cells, and **(B)** their subpopulations are shown. Naive, central memory (CM) and effector (Eff). **(C)** Shows VACV-specific CD8 T cells. p values were determined by the Mann-Whitney test, \* =  $p < 0.05$ . NS, non-significant. **(D)** Neutralizing antibody responses determined by plaque-reduction neutralization test. IC50, half maximal inhibitory concentration; NS, non-significant by Mann-Whitney test. All experiments were performed twice and representative data from one experiment are shown.

**A**

# 1

# 2

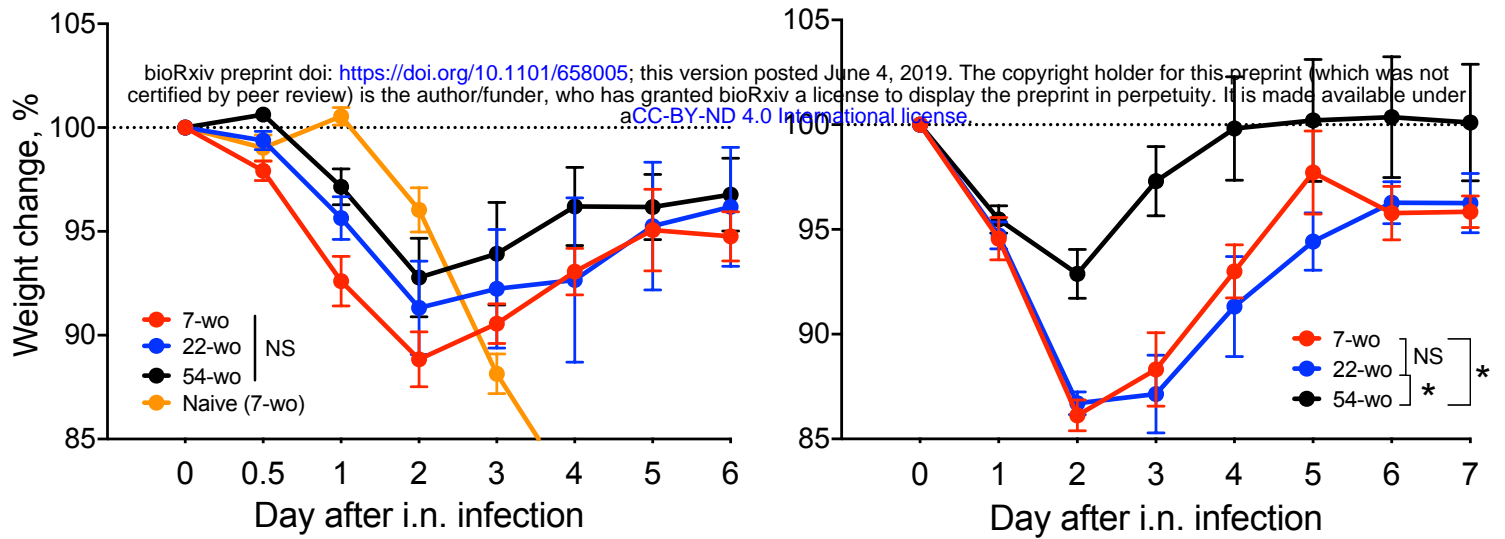**B**

# 1

# 2

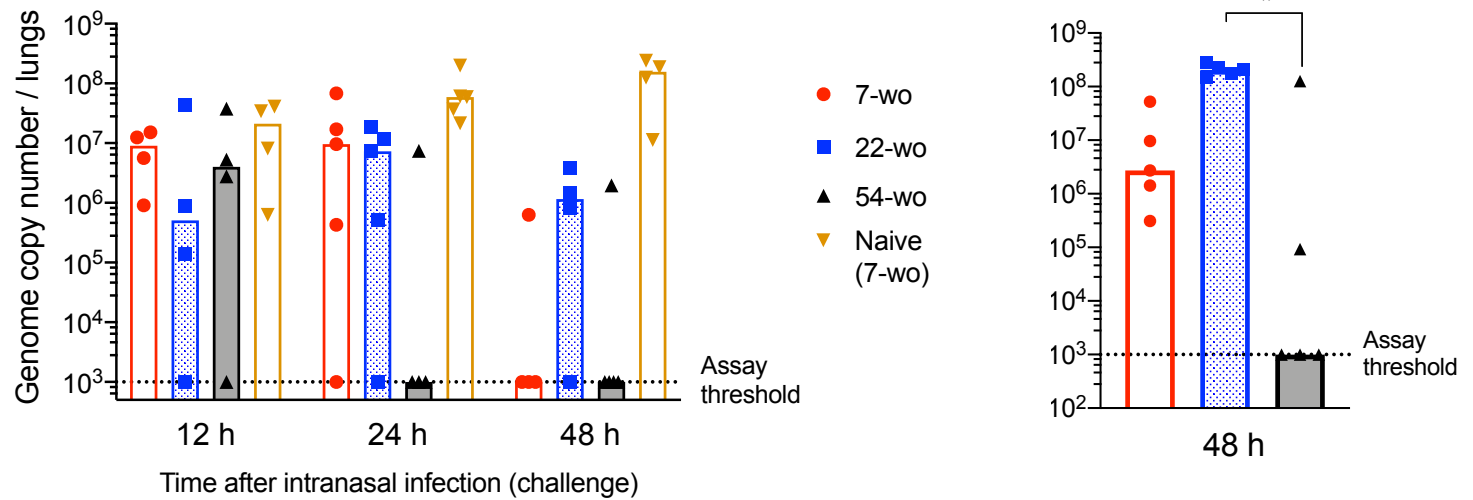

**Figure 6. 54-week old mice are better protected against VACV intranasal challenge than mice from younger groups.** Groups of 7-, 22- and 54-wo C57BL/6 mice ( $n=4-5$  per group) were injected intradermal with  $10^4$  PFU (per ear, into both ears) of VACV or PBS (mock). These groups were then challenged i.n. with  $0.7 \times 10^7$  PFU of VACV WR at day 33 post vaccination in experiment #1 (left) and with  $1.3 \times 10^7$  PFU of VACV WR in experiment #2 (right). (A) Body weight changes of mice after intranasal challenge with VACV; within each group, data show a comparison of the weight of each mouse with the weight of the same animal on day zero. The percentages for each group are means with SEM. Statistical analysis by RM ANOVA test. NS, non-significant; \* =  $p < 0.05$ . (B) Viral genome copy number in both lungs from mice at 12, 24 and 48 h post i.n. challenge were determined by qPCR. Medians are shown.

Baseline

12 h

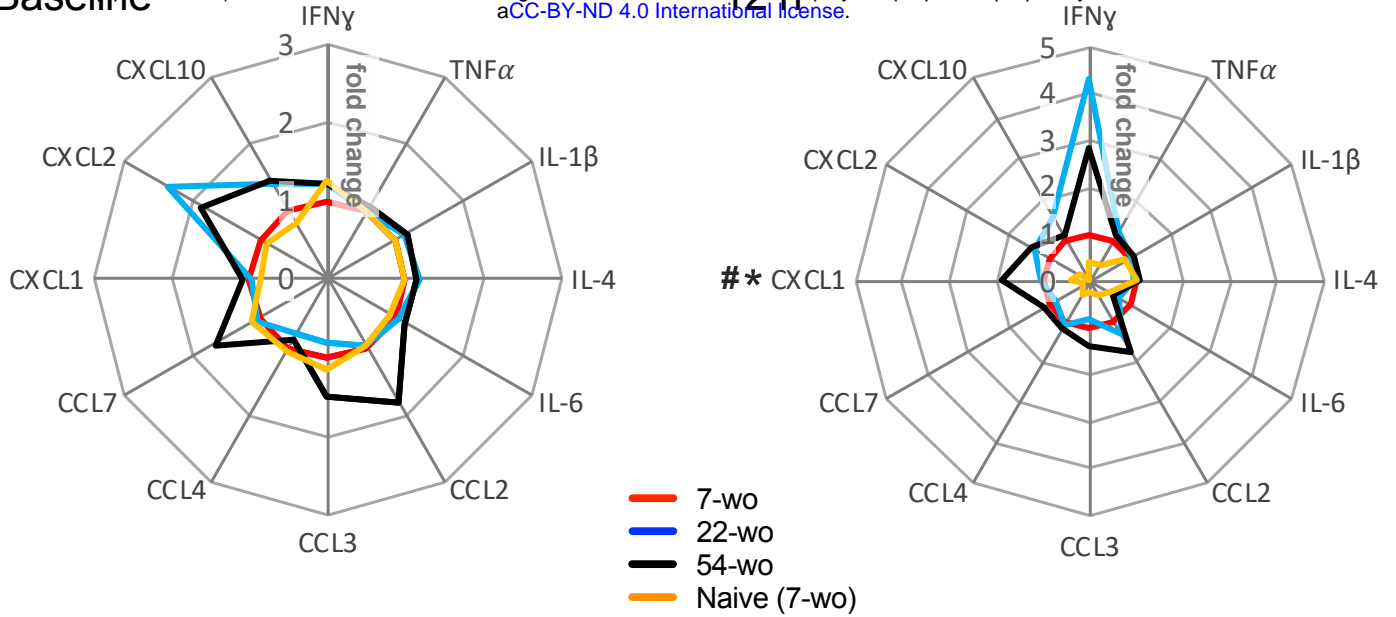

24 h

48 h

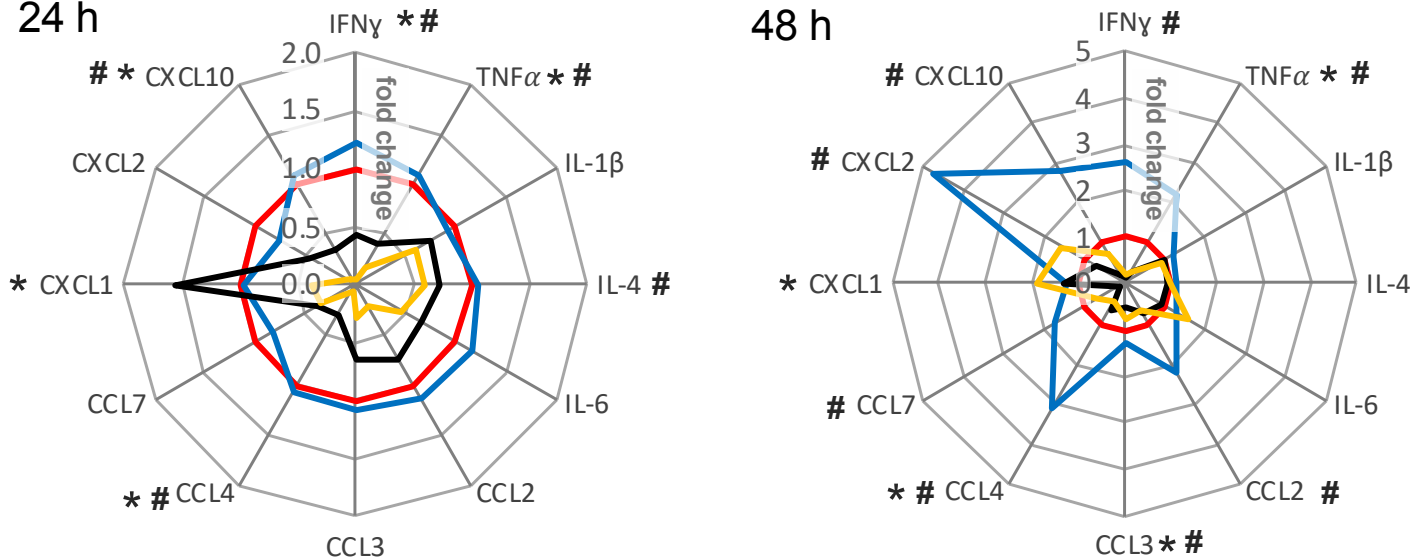

**Figure 7. Kinetics of cytokine and chemokine production in lungs after intranasal challenge with VACV correlates with the kinetics of virus clearance.** Groups ( $n=4-5$ ) of 7-, 22- and 54-wo C57BL/6 mice were vaccinated i.d. with  $10^4$  PFU (per ear, into both ears) of VACV or PBS (mock-control). Then 33 d post vaccination animals were challenged i.n. with VACV WR. Lungs of vaccinated and mock-vaccinated mice were collected at 12, 24 and 48 h after challenge. The levels of cytokines and chemokines were measured by multiplex assay (Luminex). Data are shown as the fold change from the vaccinated 7-wo group, which is assigned a value of 1. Means are shown; p values were determined by the Mann-Whitney test. \* =  $p < 0.05$  between 7- and 54-wo animals, # =  $p < 0.05$  between 22- and 54-wo mice. The experiment was performed twice and data from one representative experiment are shown.
